# Supplementary material for: Photocatalytic activity of Ag/Al2O3–Gd2O3photocatalysts prepared by the sol–gel method in the degradation of 4-chlorophenol
Source: Royal Society of Chemistry journal article supplement (doi:10.1039/c7ra12665d), 2018-01-01
Supplement: c7ra12665d1.pdf [file c7ra12665d1.pdf]

## Supporting Information

### Photocatalytic activity of Ag/Al<sub>2</sub>O<sub>3</sub>-Gd<sub>2</sub>O<sub>3</sub> photoatalysts prepared by the sol – gel method in the degradation of 4-Chlorophenol

A. Barrera<sup>1,\*</sup>, F. Tzompantzi<sup>2,\*\*</sup>, J. Campa-Molina<sup>3</sup>, J. E. Casillas<sup>1</sup>, R. Pérez-Hernández<sup>4</sup>, G. S. Ulloa-Godinez<sup>3</sup>, C. Velázquez<sup>5</sup>, J. Arenas-Alatorre<sup>6</sup>

<sup>1</sup>Laboratorio de Nanomateriales Catalíticos, Centro Universitario de la Ciénege, Universidad de Guadalajara, Av. Universidad, No. 1115, Col. Linda Vista, C.P. 47820, Ocotlán Jal., México.

\*E-mails: [arturo.barrera@cuci.udg.mx](mailto:arturo.barrera@cuci.udg.mx); [arturobr2003@yahoo.com.mx](mailto:arturobr2003@yahoo.com.mx) (A. Barrera);

Tel. +52 392 92 594 00; Fax: +52 392 92 540 30.

<sup>2</sup> Depto. de Química, Área de Catálisis, Universidad Autónoma Metropolitana – Iztapalapa, Av. San Rafael Atlixco 189, C.P. 09340, Cd. de México, México.

\*\*E-mail: [fjtz@xanum.uam.mx](mailto:fjtz@xanum.uam.mx) (F. Tzompantzi)

<sup>3</sup>Laboratorio de materiales avanzados, Universidad de Guadalajara Depto. De Electrónica, Blvd. Marcelino García Barragán 1422 esq. Calzada Olímpica, Col. Olímpica 44430, Guadalajara, Jalisco México.

<sup>4</sup>Laboratorio de Nanocatálisis, Depto. de Tecnología de Materiales, Instituto Nacional de Investigaciones Nucleares, Carr. México-Toluca S/N, La Marquesa, Ocoyoacac, Edo. De México, C.P. 52750, México

<sup>5</sup>Centro de Investigación en Nanociencia y Nanotecnología, Centro Universitario de los Valles, Universidad de Guadalajara, Ameca, Jal. 46600, México

<sup>6</sup> Universidad Nacional Autónoma de México, Instituto de Física, México D.F., México

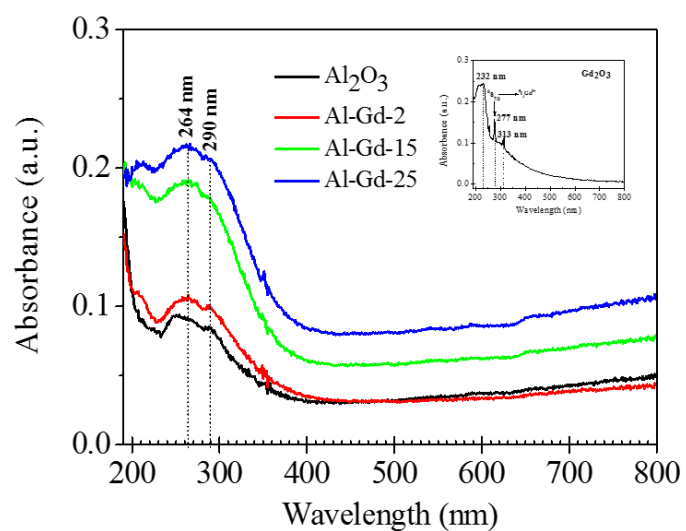

**Figure S1.** UV-Vis spectra of Al-Gd-x composite oxides. Inset: UV-Vis spectra of Gd<sub>2</sub>O<sub>3</sub>.

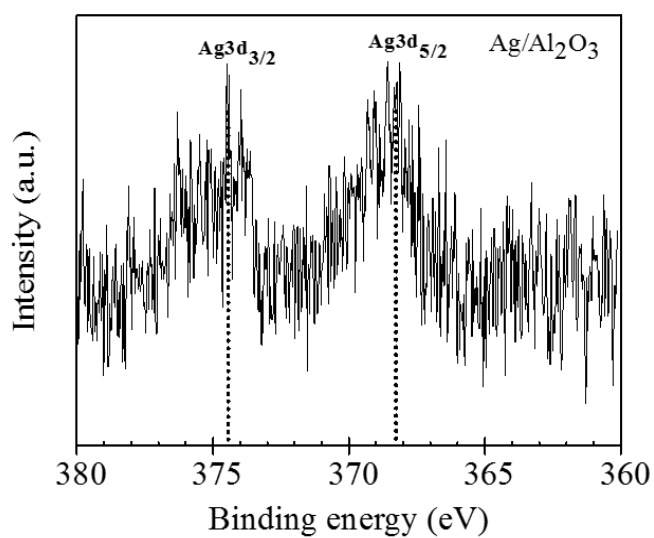

**Figure S2.** XPS Ag 3d spectra of the Ag/Al-Gd-x photocatalysts.

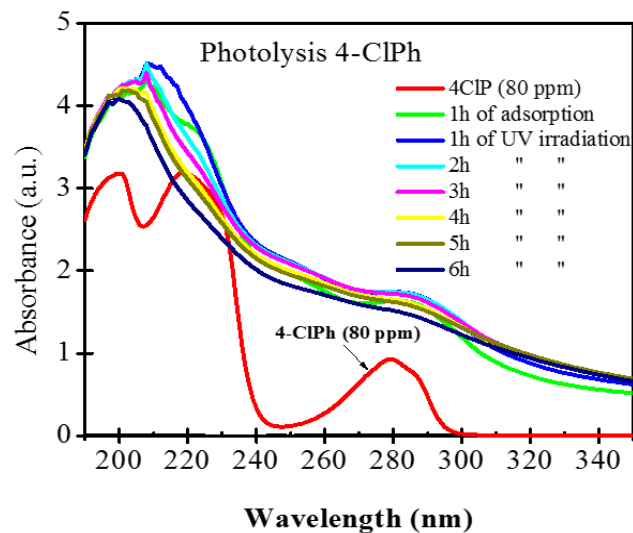

**Figure S3.** Photolysis of 4-Chlorophenol with UV light irradiation.

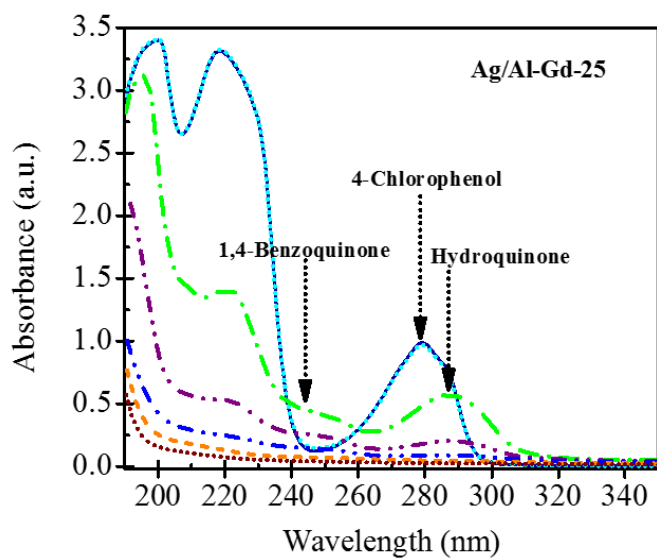

**Figure S4.** UV-Vis spectra of photodegraded 4-Chlorophenol with UV light using Ag/Al-Gd-25 as photocatalyst; the possible intermediates 1,4-Benzoquinone and Hydroquinone are indicated at the corresponding wavelength as pure compounds.

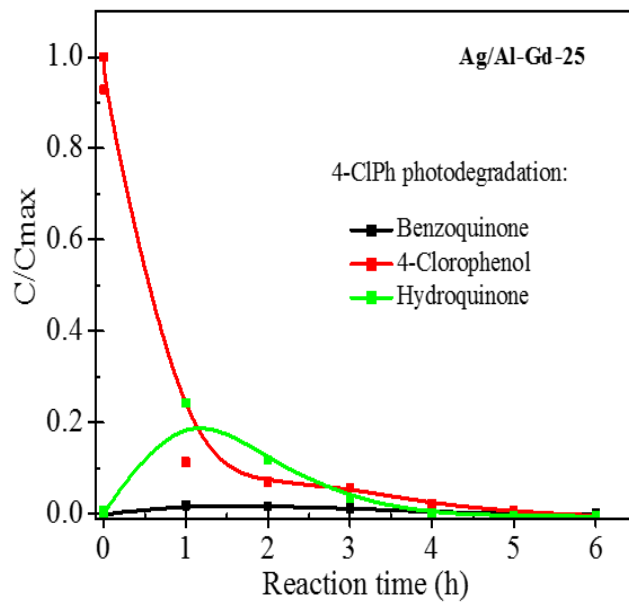

**Figure S5.**  $C/C_{max}$  vs. reaction time of 4-Chlorophenol, 1,4-Benzoquinone and Hydroquinone after UV light irradiation using the Ag/Al-Gd-25 photocatalyst.

Table S1. Concentration of 1,4-benzoquinone, hydroquinone and phenol as a function of the UV light irradiation time over Ag/Al-Gd-25 photocatalyst.

| UV light<br>Irradiation Time<br>(h) | [Benzoquinone]<br>(mol/L) | [4-Chlorophenol]<br>(mol/L) | [Hidroquinone]<br>(mol/L) |
|-------------------------------------|---------------------------|-----------------------------|---------------------------|
| 0                                   | 0.00                      | 6.65E-4                     | 0.00                      |
| 1                                   | 1.20E-5                   | 7.52E-05                    | 1.61E-4                   |
| 2                                   | 1.13E-5                   | 4.69E-05                    | 7.79E-5                   |
| 3                                   | 7.94E-6                   | 3.76E-05                    | 2.22E-5                   |
| 4                                   | 2.57E-6                   | 1.43E-05                    | 2.94E-7                   |
| 5                                   | 9.10E-7                   | 3.75E-06                    | 0.00                      |
| 6                                   | 0.00                      | 0.00                        | 0.00                      |
